1  
2  
3  
4  
5  
6  
7  
8  
9  
10  
11  
12  
13  
14  
15  
16  
17  
18  
19  
20  
21  
22  
23  
24

**Orientation to polarized light in tethered flying honeybees**

Norihiro Kobayashi<sup>1</sup>, Ryuichi Okada<sup>1,2</sup> and Midori Sakura<sup>1\*</sup>

<sup>1</sup>Department of Biology, Graduate School of Science, Kobe University, Rokkodai 1-1, Nada-ku, Kobe, Hyogo 657-8501, Japan

<sup>2</sup>School of Human Science and Environment, University of Hyogo, 1-1-12 Shinzaike-Honcho, Himeji, Hyogo 670-0092, Japan

Running title: Polarotaxis in flying honeybees

Key Words: insect flight; polarization vision; dorsal rim area; polarotaxis; navigation

\*Correspondence to Midori Sakura

Phone: +81-78-803-5711 Fax: +81-78-803-5711

E-mail: skr@port.kobe-u.ac.jp

**Abbreviations:**

clockwise; CW

counterclockwise; CCW

dorsal rim area; DRA

preferred e-vector orientation; PEO

25 **Summary statement**

26 Tethered flying bees exhibited polarotaxis under a zenithal rotating e-vector stimulus, in which  
27 their right-and-left abdominal movements were coincident with the rotation of the stimulus.

28

29 **ABSTRACT**

30 Behavioral responses of honeybees to a zenithal polarized light stimulus were observed using a  
31 tethered animal in a flight simulator. Flight direction of the bee was recorded by monitoring the  
32 horizontal movement of its abdomen, which was strongly anti-correlated with its torque. When  
33 the e-vector orientation of the polarized light was rotated clockwise or counterclockwise, the bee  
34 responded with periodic right-and-left abdominal movements; however, the bee did not show any  
35 clear periodic movement under the static e-vector or depolarized stimulus. The steering frequency  
36 of the bee was well coordinated with the e-vector rotation frequency of the stimulus, indicating  
37 that the flying bee oriented itself to a certain e-vector orientation, i.e., exhibited polarotaxis. The  
38 percentage of bees exhibiting clear polarotaxis was much smaller under the fast stimulus ( $3.6^\circ$   
39  $s^{-1}$ ) compared with that of the slow stimulus ( $0.9$  or  $1.8^\circ s^{-1}$ ). The bee did not demonstrate any  
40 polarotactic behavior after the dorsal rim region of its eyes, which mediates insect polarization  
41 vision in general, was bilaterally covered with black paint. The bees demonstrated a high  
42 preference for e-vector orientations between  $120$  to  $180^\circ$ . Each bee exhibited similar e-vector  
43 preferences under clockwise and counterclockwise stimuli, indicating that each bee has its own  
44 e-vector preference, which probably depends on the bee's previous foraging experience. Our  
45 results strongly suggest that the flying honeybees utilize the e-vector information from the  
46 skylight to deduce their heading orientation for navigation.

## 47 INTRODUCTION

48 As a result of sunlight scattering in the atmosphere, the skylight is partially plane-polarized and  
49 the celestial e-vectors are arranged in a concentric pattern around the sun (Strutt, 1871; Wehner,  
50 1997). It is well known that many insects exploit this skylight polarization for visual compass  
51 orientation and/or navigation (for review: Wehner, 1994; Wehner and Labhart, 2006; Heinze,  
52 2014). There have been an enormous number of studies about insect polarization vision, not only  
53 at the behavioral level (e.g., Dacke et al., 2003; Reppert et al., 2004; Henze and Labhart, 2007;  
54 Weir and Dickinson, 2012), but also at the neural network level, such as sensory (e.g., Blum and  
55 Labhart, 2000; Weir et al., 2016) and central brain mechanisms (e.g., Labhart 1988; Heinze and  
56 Homberg, 2007; Sakura et al., 2008; Heinze and Reppert, 2011; Bech et al., 2014). The e-vector  
57 detection in insects is mediated by a group of specialized ommatidia located in the most dorsal  
58 part of the compound eye, the dorsal rim area (DRA), in which the photoreceptors are  
59 monochromatic and highly polarization-sensitive (for review: Labhart and Meyer, 1999; Wehner  
60 and Labhart, 2006). The neural pathway of polarization vision in the brain has been documented  
61 in several species, and the central complex, one of the higher centers of the insect brain, is  
62 considered to be the location of an internal compass (for review: Homberg et al., 2011; Heinze,  
63 2017), although it is still unclear how the central complex controls the animal's steering during  
64 navigation.

65 Foraging behavior in social insects, such as ants and bees, is a useful model system for  
66 studying insect navigation because they repeatedly forage back and forth between the nest and a  
67 feeding site. In particular, the path integration mechanisms in the desert ants *Cataglyphis* have  
68 been extensively studied in regard to insect navigation (Wehner, 2003; Collett and Carde, 2014),  
69 and *Cataglyphis* is well known to choose their heading direction using celestial polarization cues  
70 during long distance navigation (Fent, 1986; Wehner, 1997; Wehner and Müller, 2006). In  
71 addition to path integration based on the polarization compass, ants could learn visual landmarks  
72 or panoramic views at familiar locations and use them for local navigation (Collett et al., 1992;  
73 Wehner et al., 1996; Collett et al., 1998; Graham and Cheng, 2009; Narendra et al., 2013).  
74 Honeybees also undertake long-distance foraging trips, that may reach over 40 km (Couvillon et  
75 al., 2014). The foragers, after returning from a food source, transfer the food location to their  
76 nestmates by the waggle dance, in which the vector information from their nest to the food  
77 location is encoded. This clearly indicates that honeybees navigate based on path integration  
78 (Frisch, 1967). The waggle dance has also been used to clarify the utilization of polarization  
79 vision in their navigation. Under unpolarized light, the dancing honeybees failed to transfer the

80 correct directional information to the food source and their waggle dance orientations were  
81 strongly affected by artificially-polarized light (Frisch, 1967; Rossel and Wehner, 1987; Sherman  
82 and Visscher, 2002). More recently, it was reported that they changed their waggle dance  
83 orientations depending on the e-vectors of polarized light experienced during their foraging trip  
84 (Evangelista *et al.*, 2014). These results suggest that the honeybees use polarization vision for  
85 path integration, i.e., deducing the direction to the food source. In contrast to investigations  
86 regarding path integration into the waggle dance, to our knowledge, there has been only one  
87 study that examined whether a flying bee can use celestial e-vector information to choose its  
88 flight route. Kraft *et al.* (2011) showed that bees trained to fly in a four-armed maze to a feeder,  
89 in which the bees received polarized light stimulus from above, chose their foraging routes as  
90 they received e-vector information, similar to what they experienced during the training. This  
91 suggests that the flying bees actually sense the e-vector orientation from the sky and use it for  
92 navigation.

93         Similar to ants, honeybees display both path integration and visual landmark navigation.  
94 Bees use familiar landmarks to find the correct location (Cartwright and Collett, 1983; Fry and  
95 Wehner, 2005), and in some cases, visual landmarks dominate path integration (Chittka and  
96 Kunze, 1995). Furthermore, a single bee can memorize several food locations simultaneously  
97 based on the landmarks at each location and visit the best one among the destinations in a  
98 context-dependent manner (Collett and Kelber, 1988; Zhang *et al.*, 2006). To accomplish those  
99 complicated navigational tasks, foraging bees must use multiple navigational strategies, as the  
100 situation demands, by using several visual cues such as polarized light and landmarks. However,  
101 it still remains largely unknown how honeybees behaviorally select and use polarized light or  
102 landmark cues during navigational flight. This is probably because of the technical difficulties of  
103 presenting artificial visual stimuli to freely flying bees (Evangelista *et al.*, 2014).

104         Recently, some behavioral studies have overcome this difficulty by using tethered bees  
105 (Luu *et al.*, 2011; Taylor *et al.*, 2013), with which we can observe responses in flying behavior of  
106 the dorsally tethered bees to lateral optic flow and frontal air-flow stimuli. It was observed that  
107 the tethered bees showed “streamlining” responses, whereby they raised their abdomen in a  
108 correlated manner with the speed of the optic and air-flow stimuli. In the present study, we  
109 investigated how the flying bees respond to polarized light stimuli using the tethered system. We  
110 constructed a flight simulator, in which we could examine the tethered bee’s flight response to a  
111 rotating polarized stimulus and found that they tended to orient themselves to a certain e-vector  
112 direction, i.e., they exhibited clear “polarotaxis,” during the flight.

113

## 114 MATERIALS AND METHODS

### 115 Animals

116 The honeybees, *Apis mellifera L.*, used in this study were reared in normal ten-frame hives on the  
117 campus of Kobe University. Forager honeybees with pollen loads were collected at the hive  
118 entrance before the experiment and anesthetized on ice or in a refrigerator. An L-shaped metal  
119 rod for tethering was attached to the pronotum of an anesthetized bee, as previously described  
120 (Luu *et al.*, 2011). Briefly, the hair on the pronotum was gently shaved using a small piece of a  
121 razor blade, and the metal rod was adhered using a small amount of light-curing adhesive  
122 (Loctite; Henkel, Dusseldorf, Germany). The following image analyses of bee behavior (see  
123 below) were conducted by marking the tip of the abdomen with a white light-curing dental  
124 sealant (Conseal f; SDI Ltd., Bayswater, Australia). Next, the bees were placed in a warm room  
125 to recover from anesthesia and fed several drops of 30 % sucrose solution before the experiment.

### 126 Setup

127 The experiments were performed using a custom-made black box (Fig. 1) in a dark room. A  
128 tethered bee was mounted in the box by attaching the end of the metal rod to a three-dimensional  
129 manipulator such that the bee's location could be adjusted manually. The flying behavior of the  
130 tethered bee was enhanced by stimulating the bee with a headwind from an air circulator and  
131 optic flow from a PC monitor. The circulator was located outside of the box and connected to a  
132 tunnel that carried the wind stimulus into the box. The end of the tunnel (diameter, 8 cm),  
133 consisting of many fine plastic straws to reduce the turbulent flow of wind, was fixed at 10 cm  
134 from the bee's head. The wind speed was 1.7–2.0 m s<sup>-1</sup>. The PC monitor (RDT1711LM;  
135 Mitsubishi Electric, Tokyo, Japan), covered with a sheet of tracing paper to eliminate any  
136 polarized components of the light, was located 5 cm beneath the tethered bee. The optic flow  
137 stimulus of moving black-and-white stripes was displayed on the monitor using a self-made  
138 program in Microsoft Visual C<sup>++</sup>. The spacing of the stripes and the speed of the stimulus as seen  
139 by the bee were approximately 40 ° s<sup>-1</sup> and 900 ° s<sup>-1</sup>, respectively.

140 Light from a xenon lamp (LC8; Hamamatsu Photonics, Hamamatsu, Japan) was applied  
141 above the bee using a quartz light guide. The light was filtered using a depolarizer (DPU-25;  
142 ThorLabs, Newton, NJ) at the end of the light guide to eliminate any polarized components of the  
143 light and a holographic diffuser (48-522; Edmund Optics, Barrington, NJ) was clamped under the  
144 end of the light guide. The diffuser reduced illuminance irregularity and increased the size of the  
145 light fit around a linear polarizer (HN42HE; diameter, 15 cm; Polaroid Company, Cambridge,

146 MA) beneath the diffuser. The polarizer was mounted on a circular holder that could be rotated  
147 using a DC motor. The stimulus was centered at the bee's zenith (with respect to flying head  
148 position) at a distance of 15 cm, providing a dorsal, polarized stimulus of 53 ° in diameter. In the  
149 experiments, in which unpolarized light stimulus was used, the depolarizer was clamped just  
150 above the bee's head instead of at the end of the light guide such that the size of the light stimulus  
151 covered the entire receptive field of the bee's DRA. The intensity of the polarized and  
152 unpolarized white light at the animal level was approximately 1000 lx.

### 153 **Behavioral experiments**

154 A bee with the metal rod was fixed in the experimental box after complete recovery from  
155 anesthesia. First, we let the bee hold a small piece of paper so that it could not start flying. The  
156 e-vector angle of the polarizer was set at 0° with respect to the bee's body axis, and static  
157 black-and-white stripes were displayed on the PC monitor. After the bee had been familiarized  
158 with the box, the paper was removed to allow the bee to start flying, and the wind and optic flow  
159 stimuli were simultaneously presented. After the bee's flight became stable, the polarizer started  
160 rotating slowly (0.9, 1.8, or 3.6 ° s<sup>-1</sup>), and the behavior of the bee was monitored for 600 s. When  
161 a bee stopped flying before 600 s, the data were not used in the analysis. In some cases, the bee  
162 was tested 3 times under different stimulus conditions—clockwise (CW), static, and  
163 counterclockwise (CCW). The order of these three stimuli was randomly changed for each  
164 experiment. In other cases, a bee was tested only with the CW stimulus.

165 The flying behavior of the tethered bee was monitored using a USB camera  
166 (IUC-300CK2; Trinity Inc., Gunma, Japan) placed behind the bee (see Fig. 1). Images of the bee  
167 were recorded at a rate of 1 Hz, i.e., 600 images for 10 min data. For each image, the  
168 x-coordinate of the bee's abdominal tip was determined manually to estimate flying orientation  
169 (see Fig. S1). A series of x-coordinates was then calibrated into actual distances (in mm) from the  
170 center, where the tethering wire was fixed and used for further analysis (see below).

171 Whether the DRA of the compound eye was involved in flying behavior under the  
172 polarized light stimulus was determined using bees whose DRAs were painted (Fig. 7C, D). The  
173 DRAs were painted as in our previous work (Sakura et al., 2012) with black acrylic emulsion  
174 paint (Herbol; Cologne, Germany) under a dissecting microscope just before the tethering  
175 procedure described above. The DRA of a compound eye is visually identifiable because the  
176 cornea appears slightly grey and cloudy (Meyer and Labhart, 1981). Because it was technically  
177 not possible to cover the DRA alone, which consists of only 4–5 horizontal rows of ommatidia  
178 (see Meyer and Labhart, 1981; Wehner and Strasser, 1985), a small area of the unspecialized

179 dorsal region next to the DRA was also painted. After the experiments, the paint cover was  
180 checked in all the experimental animals under a dissecting microscope. Data for cases in which  
181 any of the paint was missing were excluded from further analysis. The three ocelli, which are not  
182 involved in polarization vision (Rossel and Wehner, 1984), were not painted in the experiments.

### 183 **Analysis and statistics**

184 All data analyses were performed using self-made programs in MATLAB (MathWorks Inc., MA,  
185 USA). Periodicity of the time course of the abdominal tip location was analyzed using the fast  
186 Fourier transform (FFT). For FFT, data for only the last 400 s of each trajectory (600 s in total)  
187 were used because the periodicity of a bee's flight was occasionally unstable at the beginning of  
188 the stimulus (e.g., see Fig. 2Ac). The relative power spectrum was calculated, and peak  
189 frequencies were determined. We defined a bee to be aligned with a certain e-vector orientation  
190 or showing "polarotaxis", when the power spectrum of the bee showed a peak at the stimulus  
191 frequency, i.e., 0.5, 0.01, and 0.02 Hz for 0.9, 1.8, and 3.6 ° s<sup>-1</sup> stimuli, respectively. Distributions  
192 of bees showing polarotaxis were statistically analyzed using Fisher's exact test or Cochran's  
193 *Q*-test with post-hoc McNemar test for among- or within-group comparisons, respectively. In  
194 addition, the largest peak in the power spectrum of each bee was determined to compare the  
195 distribution of the peaks by a bee.

196 In the case of experiments where 1.8 ° s<sup>-1</sup> CW stimulus was used, a preferred e-vector  
197 orientation (PEO) for each bee that demonstrated polarotaxis was obtained from a phase of the  
198 stimulus frequency component (0.01 Hz) in the division signal after FFT. The uniformity of the  
199 distribution of PEOs was statistically analyzed using the Rayleigh test (Batschelet, 1981). For the  
200 bees showing polarotaxis to both CW and CCW stimuli, differences in the PEOs between these  
201 two stimuli were also calculated for each bee by subtracting the value of the CW stimulus from  
202 that of CCW stimulus, and the distribution of the differences was analyzed using the *V*-test with  
203 0 ° as an expected mean angle (Batschelet, 1981). All circular statistics were performed using  
204 Oriana software (ver. 3.12; Kovach Computing Services, UK).

205

## 206 **RESULTS**

### 207 **Polarotactic behavior of tethered bees**

208 Under our experimental condition, approximately two-thirds of the experimental tethered bees  
209 could stably fly for over 10 min. A representative horizontal trajectory of a bee's abdominal tip

210 under the three different polarized light conditions is shown in Fig. 2A. When the e-vector of the  
211 polarized light stimulus was gradually ( $1.8^\circ \text{ s}^{-1}$ ) rotated clockwise or counterclockwise, the bee  
212 showed a periodic right-and-left abdominal movement, regardless of the rotational direction (Fig.  
213 2Aa, c). The FFT analysis of the last 400 s of the trajectory data clearly showed that these  
214 abdominal movements were synchronized with an e-vector rotating frequency of 0.01 Hz (Fig.  
215 2Ba, c). Conversely, a bee did not show such periodic movement under the static e-vector  
216 stimulus ( $0^\circ$  with respect to the body axis; Fig. 2Ab), and the peak of the power spectrum (PS)  
217 was detected at 0.0025 Hz instead of at 0.01 Hz, which is coincident with the entire data length  
218 (Fig. 2Bb). In total, over half of the experimental bees showed a clear peak at 0.01 Hz in the PS  
219 under the rotating e-vector stimulus (12 and 14 of 21 bees for CW and CCW, respectively);  
220 however, under the static  $0^\circ$  e-vector stimulus, only 2 of the 21 bees showed a 0.01 Hz peak in  
221 the PS, which was significantly smaller than the number of bees showing a peak at 0.01 Hz under  
222 the rotating stimulus (data not shown; CW:  $p = 0.008$ , CCW:  $p = 0.001$ , Cockran's  $Q$ -test with  
223 post-hoc McNemar test). In addition, a significantly higher number of bees (7 and 6 of 21 bees  
224 for CW and CCW, respectively) displayed the highest peaks at 0.01 Hz in the PS compared with  
225 that (none of the 21 bees) under the static  $0^\circ$  e-vector stimulus (Fig. 3; CW:  $p = 0.008$ , CCW:  $p =$   
226 0.014, Cockran's  $Q$ -test with post-hoc McNemar test). In the averaged PS, a clear peak was noted  
227 at 0.01 Hz under the CW or CCW stimulus, although another strong peak was detected at 0.0025  
228 Hz (Fig. 3A, C), and the peak was only detected at 0.0025 Hz under the static stimulus (Fig. 3B).

229 To determine whether the periodic movements were not elicited by the rotation of the  
230 e-vector, but rather by a slight fluctuation in light intensity caused by the polarizer rotation, we  
231 projected an unpolarized light stimulus through the depolarizer beneath the rotating polarizer (see  
232 Materials and Methods). Under the unpolarized light stimulus, the bees did not show any clear  
233 movements coincident with the polarizer rotation (Fig. 4A). Furthermore, no detectable peak at  
234 0.01 Hz was noted in the averaged PS, and none of the five experimental bees demonstrated the  
235 highest peak at 0.01 Hz (Fig. 4B). Only one bee showed a small PS peak at 0.01 Hz, which was  
236 not significantly different from that under the static e-vector stimulus ( $p = 0.4885$ , Fisher's exact  
237 test). These results indicate that the abdominal periodic movements were elicited by the rotation  
238 of the polarized e-vector orientation.

239 We also determined the relationship between a tethered bee's abdominal location and its  
240 flying behavior (see Fig. S1). Simultaneous recordings of the abdominal images and the yaw  
241 torque of a flying tethered bee showed a strong negative correlation, i.e., the bee's abdominal tip  
242 moved right when the bee turned left and *vice versa*. Therefore, a bee's periodic abdominal  
243 movement under the rotating e-vector stimulus could be considered a kind of polarotaxis to adjust



244 the flying direction to a certain e-vector orientation.

### 245 **Polarotaxis under the different speeds of the stimulus**

246 Next, we observed polarotaxis of the tethered bees under CW rotating e-vector stimulus at twice  
247 the speed ( $3.6^\circ \text{ s}^{-1}$ ) or 2-times slower the speed ( $0.9^\circ \text{ s}^{-1}$ ) to confirm that the periodicity in the  
248 abdominal movement (Fig. 2, 3) was not elicited by internal rhythm but by external polarized  
249 light stimuli. Under the faster stimulus, some bees still showed right-and-left abdominal  
250 movements synchronized to the stimulus rotation (Fig. 5A). However, in contrast to the  $1.8^\circ \text{ s}^{-1}$   
251 stimulus, the PS of the abdominal trajectory showed only a small peak at a stimulus frequency of  
252 0.02 Hz (Fig. 5B). Moreover, in the averaged PS of all 14 experimental bees, a small, but  
253 detectable, peak at 0.02 Hz and the highest peak at 0.0025 Hz were noted (Fig. 5C). The number  
254 of bees showing the peak at 0.02 Hz in the PS was significantly different from experiencing the  
255 static or  $1.8^\circ \text{ s}^{-1}$  stimulus (7 of 14 bees for  $3.6^\circ \text{ s}^{-1}$  and none of the 21 bees for static and  $1.8^\circ \text{ s}^{-1}$   
256 stimulus;  $p = 0.0005$ , Fisher's exact test), although only one of the 14 experimental bees showed  
257 the highest peak at 0.02 Hz (Fig. 5C). These results indicated that the bees exhibited weak  
258 polarotactic behavior to the fast rotating e-vector stimulus.

259 Under the slower rotating stimulus, the tethered bees showed clear right-and-left  
260 abdominal movements, the PS of which had the highest peak at the stimulus frequency of 0.005  
261 Hz (Fig. 6A, B). Four of the 10 experimental bees exhibited the highest peak at 0.005 Hz in each  
262 PS of the abdominal trajectory (Fig. 6C), whereas only one of the 21 bees did so under the  $1.8^\circ \text{ s}^{-1}$   
263 stimulus, which was significantly lower ( $p = 0.0274$ , Fisher's exact test). This result indicated  
264 that the bees also responded to a slow stimulus. However, we could not detect a 0.005 Hz peak in  
265 the averaged PS, although the power at 0.005 Hz was relatively high compared with that under  
266 other stimulus conditions (Fig. 6C); this could have occurred because the peak could not be  
267 clearly separated from the peak at 0.0025 Hz owing to data interference from unresponsive bees  
268 (see Figs 3B, 4C). Probably for similar reasons, the number of bees demonstrated the highest  
269 peak at 0.005 Hz was not significantly different from that of the static e-vector stimulus (4 of the  
270 21 bees;  $p = 0.3809$ , Fisher's exact test).

### 271 **Selective stimulation of eye regions**

272 Polarization vision in insects is known to be mediated by the DRA of the compound eye. To  
273 confirm the sensory input area for polarotaxis in the eye, we covered a part of each compound  
274 eye and restricted the area receiving light stimulation to the DRA (Fig. 7D, E). The bees whose  
275 DRA was covered did not show polarotactic abdominal movement even under the  $1.8^\circ \text{ s}^{-1}$

276 rotating polarized light stimulus to which intact bees responded (Fig. 7A), and no clear peak was  
277 noted at the stimulus frequency of 0.01 Hz in the power spectrum (Fig. 7B). The averaged power  
278 spectrum of all eight experimental bees did not exhibit a peak at 0.01 Hz (Fig. 7C), indicating  
279 that the bees with covered DRA lost the ability to orient to certain e-vectors. Similar to the  
280 response of intact bees to a static stimulus, none of the eight bees displayed the highest peak at  
281 0.01 Hz (Fig. 7C, see also Fig. 3B), and their response was not significantly different ( $p = 1$ ,  
282 Fisher's exact test). Conversely, the number of bees showing the highest peak at 0.01 Hz was also  
283 not significantly different than that of the intact bees under the CW stimulus (see Figs 3A, 7C;  $p$   
284 = 0.1421, Fisher's exact test), probably owing to the small number of experimental bees used.

### 285 **Preferred e-vector orientation**

286 We assessed the PEOs of the 21 bees that showed polarotaxis under the  $1.8^\circ \text{ s}^{-1}$  CW stimulus.  
287 The PEO of each bee varied from 0 to  $180^\circ$  (Fig. 8A) However, more than half of the bees (14 of  
288 21) showed PEOs between  $120^\circ$  to  $180^\circ$  and the distribution was not significantly random ( $p =$   
289  $0.009$ , Rayleigh test). To confirm whether each bee had a specific PEO, we compared the PEO to  
290 the CW and CCW stimuli in the same bee. The angular differences in PEOs between CW and  
291 CCW stimuli of 7 bees, which showed clear polarotaxis under both conditions, are shown in Fig.  
292 8B. The distribution of the angular differences was not significantly random ( $p = 0.01$ , Rayleigh  
293 test), but was concentrated around  $0^\circ$  ( $p = 0.026$ , V-test), suggesting that each bee had a certain  
294 PEO and adjusted the flight direction by aligning to a particular e-vector angle.

295

## 296 **DISCUSSION**

### 297 **Behavioral response to the polarized light stimulus in the honeybee**

298 It is well known that honeybees use skylight polarization to detect their intended travel direction.  
299 It was first described by von Frisch (1967) through a series of sophisticated behavioral studies on  
300 the waggle dance. Thereafter, the waggle dance orientations of the nest-returning bees from a  
301 certain feeder have been intensively studied. These studies were conducted under a patch of  
302 polarized light stimulus or part of the sky and an internal representation of the celestial e-vector  
303 map has been proposed (Rossel and Wehner, 1982, 1986, 1987; Wehner, 1997). These systematic  
304 studies have focused on modification of the waggle dance orientation and not on how the bees  
305 perceive polarized light from the sky en route to/from the nest. More recently, direct observation  
306 of polarized light detection in flying bees has been performed using a four-armed tunnel maze  
307 with a polarizer on top (Kraft et al., 2011). In this experiment, it was revealed that bees choose

308 their flying direction based on zenithal polarized light information. Moreover, it has also been  
309 demonstrated that bees memorize the e-vector orientations experienced during their foraging  
310 flight and use that memory for the subsequent waggle dances (Evangelista *et al.*, 2014). In the  
311 present study, we directly showed that bees tended to orient to the certain e-vector angles during  
312 their flight under the tethered condition, i.e., they referred polarized light information to control  
313 their flight direction. The fact that fewer bees responded to the fast stimulus ( $3.6^\circ \text{ s}^{-1}$ , Fig. 5) than  
314 the slow stimuli ( $0.9^\circ \text{ s}^{-1}$  and  $1.8^\circ \text{ s}^{-1}$ , Fig. 2, 3, 6) is also indicative of the use of e-vector  
315 orientation as a global cue for orientation. Probably, they did not refer to the e-vector when it  
316 quickly changed because they did not expect such a situation, except when they quickly changed  
317 their flight direction.

318         The polarotactic behaviors were not observed when the bee's DRA was blinded (Fig. 7).  
319 It is well known that detection of skylight polarization in insects is mediated by ommatidia in the  
320 DRA (for review: Labhart and Meyer, 1999; Wehner and Labhart, 2006). In honeybees,  
321 UV-sensitive photoreceptors of the ommatidia in DRA are highly polarization-sensitive, and their  
322 receptive field covers a large part of the celestial hemisphere, which is suitable for observing the  
323 sky (Labhart, 1980, Wehner and Strasser, 1985). Behaviorally, it has also been demonstrated that  
324 covering the DRA impaired correct coding of food orientation by the waggle dance orientation  
325 (Wehner and Strasser, 1985). These results clearly show that bees utilize polarized light detected  
326 by the ommatidia in the DRA for orientation.

### 327 **Polarotaxis in insects**

328 Polarotactic behavior in insects has been demonstrated in several species. Obviously, orientation  
329 to a certain e-vector direction is a common occurrence among insect species that utilize skylight  
330 polarization for navigation. Classically, it has been tested using a treadmill device in the cricket  
331 *Gryllus campestris* (Brunner and Labhart, 1987) and the fly *Musca domestica* (von Philipsborn  
332 and Labhart, 1990). Using such a device, the insect was tethered on an air-suspended ball and its  
333 walking trajectory could be monitored through the rotation of the ball. In these species, the insect  
334 on the ball showed clear polarotactic right-and-left turns when the e-vector of the zenithal  
335 polarized light stimulus was slowly rotated, as we showed in this study in flying honeybees. This  
336 kind of behavior does not merely demonstrate they have polarization vision but also allowed us to  
337 clarify fundamental properties of insect polarization vision, e.g., perception through the DRA in  
338 the compound eye (Brunner and Labhart, 1987), monochromatic spectral sensitivity (Herzmann  
339 and Labhart, 1989; von Philipsborn and Labhart, 1990), and sensitivity to the degree of  
340 polarization (Henze and Labhart, 2007).

341 Orientation to the polarized light has been investigated in tethered flying insects as well.  
342 In the locust *Schistocerca gregaria*, direct monitoring of yaw-torque responses showed clear  
343 polarotactic right-and-left turns to rotating polarized light (Mappes and Homberg, 2004). In  
344 tethered monarch butterflies *Danaus plexippus*, measuring flight orientations using an optical  
345 encoder revealed that their flight orientation under natural skylight was clearly affected by a  
346 dorsally presented polarization filter (Reppert et al., 2004; but see also Stalleicken et al., 2005).  
347 Similar orientation to polarized skylight has also been demonstrated in *Drosophila* (Weir and  
348 Dickinson, 2012). In this study, a fly was magnetically tethered in the arena and its flight heading  
349 was recorded from above by an infrared camera. A potential problem in investigating polarization  
350 vision in tethered flying insects is that sometimes the tethering apparatus, including the torque  
351 meter or other recording devices, interrupt a part of the visual field of the tested animal. In the  
352 present experiments, we succeeded in evaluating the bee's polarotactic flight steering by simply  
353 monitoring the horizontal position of the abdominal tip that was strongly anti-correlated with the  
354 torque generated by the bee (see Fig. S1). Using these methods, the entire visual field of the  
355 animal remained open; therefore, it had an advantage for investigating the animal's responses  
356 under various stimulus conditions.

### 357 **Preferred e-vector orientation**

358 The PEO distribution has been reported in several species. In crickets and flies, a weak  
359 preference to an e-vector orientation perpendicular to their body axis was demonstrated, although  
360 the reason of this behavior was not clear (Brunner and Labhart, 1987; von Philipsborn and  
361 Labhart, 1990). On the other hand, in laboratory-reared locusts, the PEOs were randomly  
362 distributed and they did not show any directional preferences (Mappes and Homberg, 2004). In  
363 the present study, the bees showed a significantly higher preference between 120 and 180 ° (Fig.  
364 8A). In each bee, the PEOs under CW and CCW stimulus were quite similar (Fig. 8B), and this  
365 suggested that each bee has its own PEO and used it not only as a reference for maintaining  
366 straight flight but also to deduce its heading orientation.

367 Considering that central place foragers, such as honeybees, have to change their  
368 navigational directions depending on the currently available food locations, their PEOs would  
369 reflect their previous foraging experiences. In the present study, we collected the bees with a  
370 pollen load at the hive entrance; therefore, all experimental forager bees were returners.  
371 Consequently, we could no longer assess their feeding locations when we measured their flight  
372 responses in the laboratory. Moreover, their path-integration vector should be reset to a zero-state  
373 in such a situation (Sommar et al., 2008), and they might not have had a strong motivation to use

374 polarized light cues for navigation. To further clarify the role of polarization vision in flying  
375 foragers, testing the PEOs in the bees in different navigational states will be crucial.

376

### 377 **Acknowledgements**

378 The authors are deeply grateful to Dr. M. V. Srinivasan and Dr. T. Luu for helpful advice  
379 regarding the construction of the flight simulator. We also thank Dr. Y. Hasegawa, Dr. H. Ikeno,  
380 and Ms. H. Onishi for their help measuring the torque of flying bees.

### 381 **Competing interests**

382 No competing interests declared.

### 383 **Funding**

384 This work was supported by KAKENHI from the Japan Society for Promotion of Science  
385 (15KT0106, 16K07439, and 17H05975 to MS; 16K07442 to RO) and Bilateral Joint Research  
386 Project with Australian Research Council from Japan Society for Promotion of Science to MS.

387

388 **REFERENCES**

- 389 **Batschelet, E.** (1981) *Circular statistics in biology*. Academic Press: New York.
- 390 **Bech, M., Homberg, U. and Pfeiffer, K.** (2014) Receptive fields of locust brain neurons are  
391 matched to polarization patterns of the sky. *Curr. Biol.* **24**, 2124-2129.
- 392 **Brunner, D. and Labhart, T.** (1987) Behavioural evidence for polarization vision in crickets.  
393 *Physiol. Entomol.* **12**, 1-10.
- 394 **Cartwright, B. A. and Collett, T. S.** (1983) Landmark learning in bees: experiments and models.  
395 *J. Comp. Physiol. A* **151**, 521-543.
- 396 **Chittka, L. and Kunze, J.** (1995) The significance of landmarks for path integration in homing  
397 honeybee foragers. *Naturwissenschaften* **82**, 341-343.
- 398 **Collett, M., Collett, T. S., Bisch, S. and Wehner, R.** (1998) Local and global vectors in desert  
399 ant navigation. *Nature* **364**, 269-272.
- 400 **Collett, T. S., Dillmann, E., Giger, A. and Wehner, R.** (1992) Visual landmarks and route  
401 following in desert ants. *J. Comp. Physiol. A* **170**, 435-442.
- 402 **Collett, T. S. and Kelber, A.** (1988) The retrieval of visuo-spatial memories by honeybees. *J.*  
403 *Comp. Physiol. A* **163**, 145-150.
- 404 **Couvillon, M. J., Schürch, R. and Ratnieks, F. L. W.** (2014) Dancing bees communicate a  
405 foraging preference for rural lands in high-level agri-environment schemes. *Curr. Biol.* **24**,  
406 1212-1215.
- 407 **Dacke, M., Nilsson, D.-E., Scholtz, C. H. Byrne, M. and Warrant, E. J.** (2003) Insect  
408 orientation to polarized moonlight. *Nature* **424**, 33.
- 409 **Evangelista, C., Kraft, P., Dacke, M., Labhart, T. and Srinivasan, M. V.** (2014) Honeybee  
410 navigation: critically examining the role of the polarization compass. *Phil. Trans. R. Soc. B* **369**,  
411 20130037.
- 412 **Fent, K.** (1986) Polarized skylight orientation in the desert ant *Cataglyphis*. *J. Comp. Physiol. A*  
413 **158**, 145-150.
- 414 **Fry, S. N. and Wehner, R.** (2005) Look and turn: landmark-based goal navigation in honey bees.

- 415 *J. Exp. Biol.* **208**, 3945-3955.
- 416 **Graham, P. and Cheng, K.** (2009) Ants use the panoramic skyline as a visual cue during  
417 navigation. *Curr. Biol.* **19**, R935-R937.
- 418 **Heinze, S.** (2014) Polarized-light processing in insect brains: recent insights from the desert  
419 locust, the monarch butterfly, the cricket, and the fruit fly. In *Polarized light and polarization*  
420 *vision in animal sciences* (ed. G. Horváth), pp. 61-111. Berlin-Heidelberg: Springer-Verlag.
- 421 **Heinze, S.** (2017) Unraveling the neural basis of insect navigation. *Curr. Opin. Insect Sci.* **24**,  
422 58-67.
- 423 **Heinze, S. and Homberg, U.** (2007) Maplike representation of celestial e-vector orientations in  
424 the brain of an insect. *Science* **315**, 995-997.
- 425 **Heinze, S. and Homberg, U.** (2009) Linking the input to the output: new sets of neurons  
426 complement the polarization vision network in the locust central complex. *J. Neurosci.* **29**,  
427 4911-4921.
- 428 **Heinze, S. and Reppert, S. M.** (2011) Sun compass integration of skylight cues in migratory  
429 monarch butterflies. *Neuron* **69**, 345-358.
- 430 **Henze, M. and Labhart, T.** (2007) Haze, clouds and limited sky visibility: polarotactic  
431 orientation of crickets under difficult stimulus conditions. *J. Exp. Biol.* **210**, 3266-3276.
- 432 **Herzmann, D. and Labahrt, T.** (1989) Spectral sensitivity and absolute threshold of  
433 polarization vision in crickets: a behavioral study. *J. Comp. Physiol. A* **165**: 315-319.
- 434 **Homberg, U., Heinze, S., Pfeiffer, K. Kinoshita, M. and el Jundi, B.** (2011) Central neural  
435 coding of sky polarization in insects. *Phil. Trans. R. Soc. B* **366**, 680-687.
- 436 **Kraft, P., Evangelista, C., Dacke, M., Labhart, T. and Srinivasan, M. V.** (2011) Honeybee  
437 navigation: following routes using polarized-light cues. *Phil. Trans. R. Soc. B* **366**, 703-708.
- 438 **Labhart, T.** (1980) Specialized photoreceptors at the dorsal rim of the honeybee's compound  
439 eye: polarizational and angular sensitivity. *J. Comp. Physiol. A* **141**, 19-30.
- 440 **Labhart, T.** (1988) Polarization-opponent interneurons in the insect visual system. *Nature* **331**,  
441 435-437.
- 442 **Labhart, T. and Meyer, E. P.** (1999) Detectors for polarized skylight in insects: a survey of

- 443 ommatidial specializations in the dorsal rim area of the compound eye. *Microsc. Res. Tech.* **47**,  
444 368-379.
- 445 **Luu, T., Cheung, T., Ball, D. and Srinivasan, M. V.** (2011) Honeybee flight: a novel  
446 ‘streamlining’ response. *J. Exp. Biol.* **214**, 2215-2225.
- 447 **Mappes, M. and Homberg, U.** (2004) Behavioral analysis of polarization vision in tethered  
448 flying locusts. *J. Comp. Physiol. A* **190**, 61-68.
- 449 **Meyer, E. P. and Labhart, T.** (1981) Pore canals in the cornea of a functionally specialized area  
450 of the honey bee’s compound eye. *Cell Tissue Res.* **216**, 491-501.
- 451 **Narendra, A., Gourmaud, S. and Zeil, J.** (2013) Mapping the navigational knowledge of  
452 individually foraging ants, *Myrmecia croslandi*. *Proc. Biol. Sci.* **280**, 20130683.
- 453 **Reppert, S. M., Zhu, H. and White, R. H.** (2004) Polarized light helps monarch butterflies  
454 navigate. *Curr. Biol.* **14**, 155-158.
- 455 **Rossel, S. and Wehner, R.** (1982) The bee’s map of e-vector pattern in the sky. *Proc. Natl. Acad.*  
456 *Sci. USA* **79**, 4451-4455.
- 457 **Rossel, S. and Wehner, R.** (1984) Celestial orientation in bees: the use of spectral cues. *J. Comp.*  
458 *Physiol. A* **155**, 605-613.
- 459 **Rossel, S. and Wehner, R.** (1986) Polarization vision in bees. *Nature* **323**, 128-131.
- 460 **Rossel, S. and Wehner, R.** (1987) The bee’s e-vector compass. In *Neurobiology and behavior of*  
461 *honeybees* (ed. R. Menzel and A. Mercer), pp. 76-93. Berlin: Springer-Verlag.
- 462 **Sakura, M., Lambrinos, D. and Labhart, T.** (2008) Polarized skylight navigation in insects:  
463 model and electrophysiology of e-vector coding by neurons in the central complex. *J.*  
464 *Neurophysiol.* **99**, 667-682.
- 465 **Sakura, M., Okada, R. and Aonuma, H.** (2012) Evidence for instantaneous e-vector detection  
466 in the honeybee using an associative learning paradigm. *Proc. Roy. Soc. B* **279**, 535-542.
- 467 **Sommer, S., von Beeren, C. and Wehner, R.** (2008) Multiroute memories in desert ants. *Proc.*  
468 *Natl. Acad. Sci. USA* **105**, 317-322.
- 469 **Stalleicken, J., Mukhida, M., Labhart, T., Wehner, R., Frost, B. and Mouritsen, H.** (2005)  
470 Do monarch butterflies use polarized skylight for migratory orientation? *J. Exp. Biol.* **208**,



- 471 2399-2408.
- 472 **Sherman, G. and Visscher, P. K.** (2002) Honeybee colonies achieve fitness through dancing.  
473 *Nature* **419**, 920–922.
- 474 **Strutt, J. (Lord Rayleigh)** (1871) On the light from the sky, its polarization and colour. *Phil.*  
475 *Mag.* **41**, 107-120.
- 476 **Taylor, G. J., Luu, T., Ball, D. and Srinivasan M. V.** (2013) Vision and airflow combine to  
477 streamline flying honeybees. *Sci. Rep.* **3**, 2614.
- 478 **von Frisch, K.** (1967) *The dance language and orientation of bees*. Cambridge: Belknap Press.
- 479 **von Philipsborn, A. and Labhart, T. (1990)** A behavioural study of polarization vision in the  
480 fly, *Musca domestica*. *J. Comp. Physiol. A* **167**, 737-743.
- 481 **Wehner, R.** (1994) The polarization-vision project: championing organismic biology. In *Neural*  
482 *basis of behavioural adaptation* (ed. K. Schildberger and N. Elsner), pp. 103-143. Stuttgart:  
483 Fischer-Verlag.
- 484 **Wehner, R.** (1997) The ant's celestial compass system: spectral and polarization channels. In  
485 *Orientation and communication in arthropods* (ed. M. Lehrer), pp. 145-185. Basel: Birkhäuser  
486 Verlag.
- 487 **Wehner, R.** (2003) Desert ant navigation: how miniature brains solve complex tasks. *J. Comp.*  
488 *Physiol. A* **189**, 579–588.
- 489 **Wehner, R. and Labhart, T.** (2006) Polarization vision. In *Invertebrate vision* (ed. E. Warrant  
490 and D. E. Nilsson), pp. 291-348. Cambridge: Cambridge University Press.
- 491 **Wehner, R. Michel, B. and Antonsen, P.** (1996) Visual navigation in insects: coupling of  
492 egocentric and geocentric information. *J. Exp. Biol.* **199**, 129-140.
- 493 **Wehner, R. and Müller, M.** (2006) The significance of direct sunlight and polarized skylight in  
494 the ant's celestial system of navigation. *Proc. Natl. Acad. Sci. USA* **103**, 12575-12579.
- 495 **Wehner, R. and Strasser, S.** (1985) The POL area of the honey bee's eye: behavioural evidence.  
496 *Physiol. Entomol.* **10**, 337-349.
- 497 **Weir, P. and Dickinson, M. H.** (2012) Flying *Drosophila* orient to sky polarization. *Curr. Biol.*  
498 **22**, 21-27.

- 499 **Weir, P. T., Henze, M., Bleul, C., Baumann-Klausener, F., Labhart, T. and Dickinson, M. H.**  
500 (2016) Anatomical reconstruction and functional imaging reveal an ordered array of skylight  
501 polarization detectors in *Drosophila*. *J. Neurosci.* **36**, 5397-5404.
- 502 **Zhang, S. W., Schwarz, S., Pahl, M., Zhu, H. and Tautz, J.** (2006) A honeybees knows what  
503 to do and when. *J. Exp. Biol.* **209**, 4420-4428.

504 **Figure legends**

505 **Fig. 1. Experimental setup.** Light from a xenon lamp was equally depolarized and then linearly  
506 polarized using a UV-transmitted polarizer. A bee was tethered under the polarizer and its flight  
507 was monitored by a USB camera. For the stable flight of a tethered bee, rectified wind from a  
508 circulator and moving black-and-white stripes on a PC monitor were presented.

509

510 **Fig. 2. A bee's abdominal movement under the polarized light stimulus.** Trajectories of the  
511 abdominal tip (**A**) and the power spectrum (**B**) under the clockwise ( $1.8^\circ \text{ s}^{-1}$ ; **a**), static (**b**), and  
512 counterclockwise ( $1.8^\circ \text{ s}^{-1}$ ; **c**) stimulus. The lower trace in each trajectory (Pol.) indicates the  
513 e-vector orientation of the polarizer with respect to the bee's body axis. Under rotating e-vector  
514 (**a** and **c**), the abdomen showed periodical movements from side to side. Dashed lines indicate the  
515 peaks at the stimulus rotation frequency (0.01 Hz).

516

517 **Fig. 3. Averaged power spectrum of the abdominal movements under the polarized light**  
518 **stimulus.** Power spectrum curves (black line) and histograms of the maximum peak in each  
519 power spectrum (gray bars) under the clockwise ( $1.8^\circ \text{ s}^{-1}$ ; **A**), static (**B**), and counterclockwise  
520 ( $1.8^\circ \text{ s}^{-1}$ ; **C**) stimulus are shown ( $N = 21$ ). Dashed lines indicate the peaks at the stimulus rotation  
521 frequency (0.01 Hz).

522

523 **Fig. 4. Abdominal movements under the depolarized light stimulus. A.** An example of the  
524 bee's abdominal trajectory. A UV-transmitted depolarizer was put just below the rotating  
525 polarizer ( $1.8^\circ \text{ s}^{-1}$ ). The lower trace (Pol.) indicates the e-vector orientation of the polarizer with  
526 respect to the bee's body axis. **B.** The power spectrum of the abdominal trajectory shown in A. **C.**  
527 Averaged power spectrum (black line) and the histogram of the maximum peak in each power  
528 spectrum (gray bars) are shown ( $N = 5$ ).

529

530 **Fig. 5. Abdominal movements under the rotating polarized light stimulus ( $3.6^\circ \text{ s}^{-1}$ ).** **A.** An  
531 example of a bee's abdominal trajectory. The lower trace (Pol.) indicates the e-vector orientation  
532 of the polarizer with respect to the bee's body axis. **B.** The power spectrum of the abdominal  
533 trajectory shown in A. **C.** Averaged power spectrum (black line) and the histogram of the  
534 maximum peak in each power spectrum (gray bars) are shown ( $N = 14$ ). Dashed lines indicate the  
535 peaks at the stimulus rotation frequency (0.02 Hz).

536

537 **Fig. 6. Abdominal movements under the rotating polarized light stimulus ( $0.9^\circ \text{ s}^{-1}$ ).** **A.** An  
538 example of a bee's abdominal trajectory. The lower trace (Pol.) indicates the e-vector orientation  
539 of the polarizer with respect to the bee's body axis. **B.** The power spectrum of the abdominal  
540 trajectory shown in **A.** **C.** Averaged power spectrum (black line) and the histogram of the  
541 maximum peak in each power spectrum (gray bars) are shown ( $N = 10$ ). Dashed lines indicate the  
542 peaks at the stimulus rotation frequency (0.005 Hz).

543

544 **Fig. 7. Abdominal movements of the DRA-covered bees under the rotating polarized light**  
545 **stimulus ( $1.8^\circ \text{ s}^{-1}$ ).** **A.** An example of a bee's abdominal trajectory. The lower trace (Pol.)  
546 indicates the e-vector orientation of the polarizer with respect to the bee's body axis. **B.** The  
547 power spectrum of the abdominal trajectory shown in **A.** **C.** Averaged power spectrum (black  
548 line) and the histogram of the maximum peak in each power spectrum (gray bars) are shown ( $N =$   
549  $8$ ). **D.** Head of the bee after its DRAs were painted. The area surrounded by the dashed line was  
550 painted. Arrow heads indicate the ocelli. CE: compound eye. **E.** Lateral view of the compound  
551 eye of the bee shown in **D.**

552

553 **Fig. 8. Preferred e-vector orientations (PEOs) of the bees caught at the hive entrance.** **A.**  
554 PEOs of the bees that showed polarotaxis under clockwise rotating stimulus ( $1.8^\circ \text{ s}^{-1}$ ) with  
555 respect to the bee's body axis. The distribution was significantly random ( $p > 0.1$ , Rao's spacing  
556 test). **B.** Angular differences in the PEOs of each bee between clockwise and counterclockwise  
557 stimulus. The distribution was not significantly random ( $p < 0.05$ , Rao's spacing test), but  
558 concentrated around  $0^\circ$  ( $p = 0.026$ , V-test).

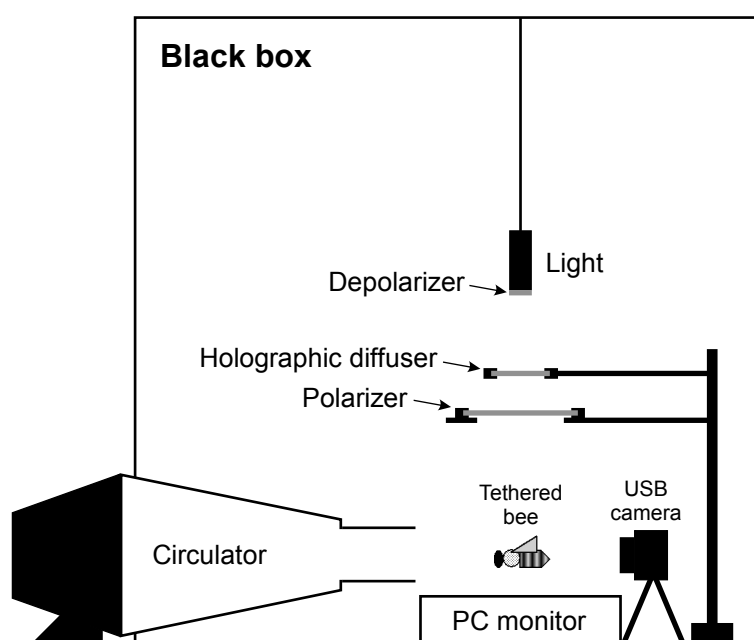

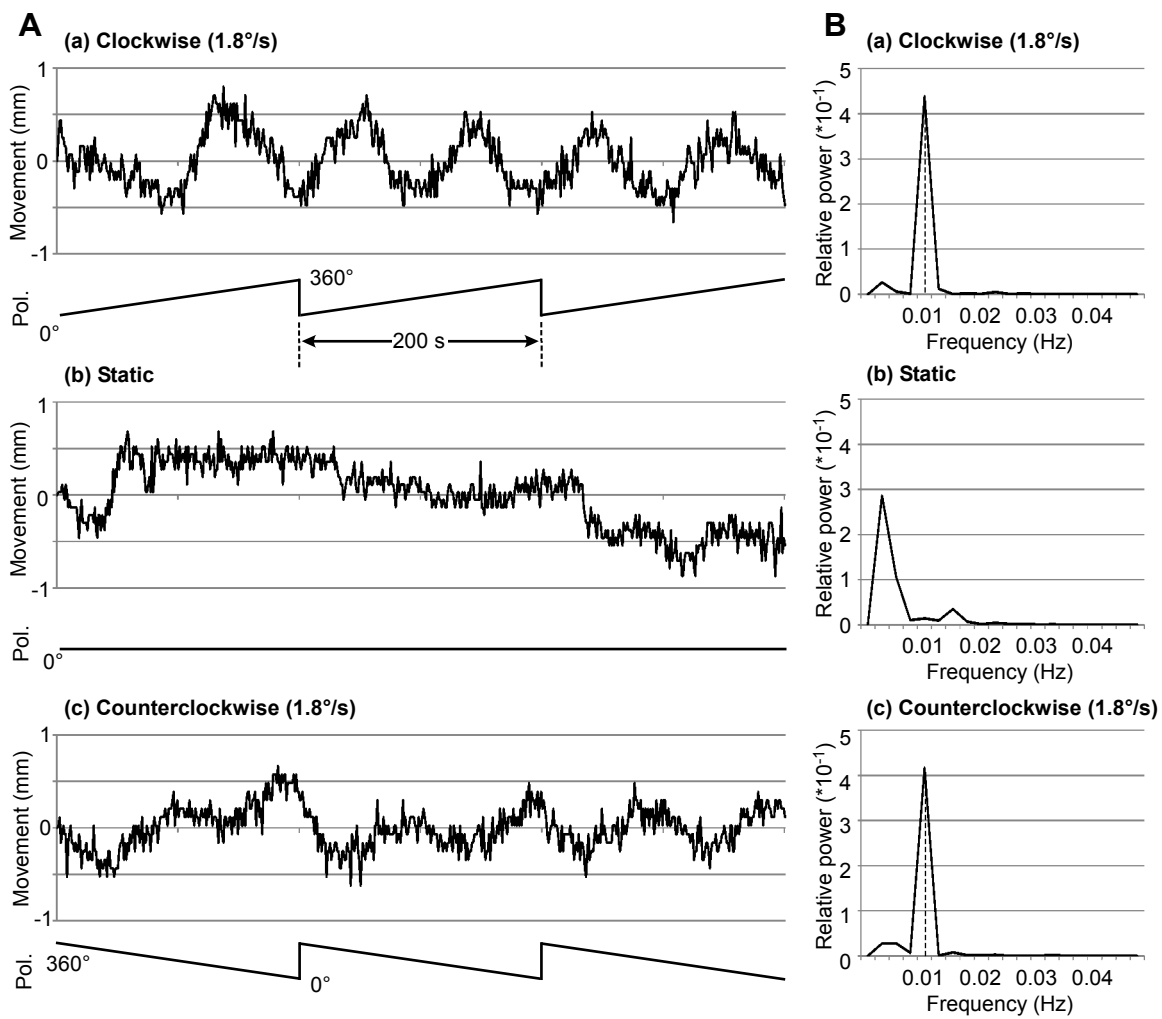

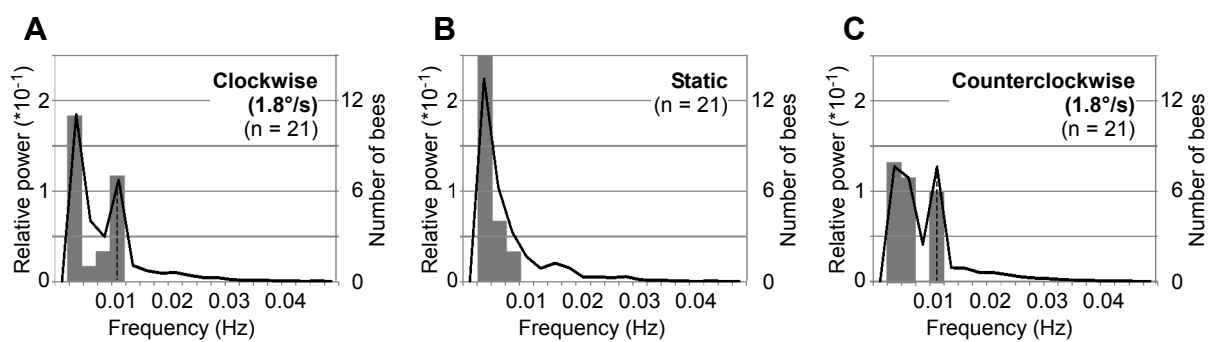

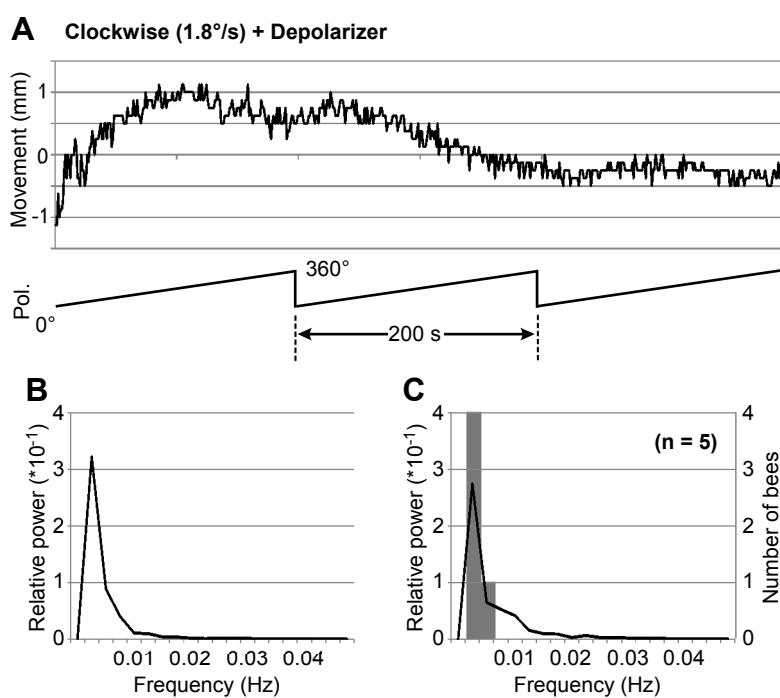



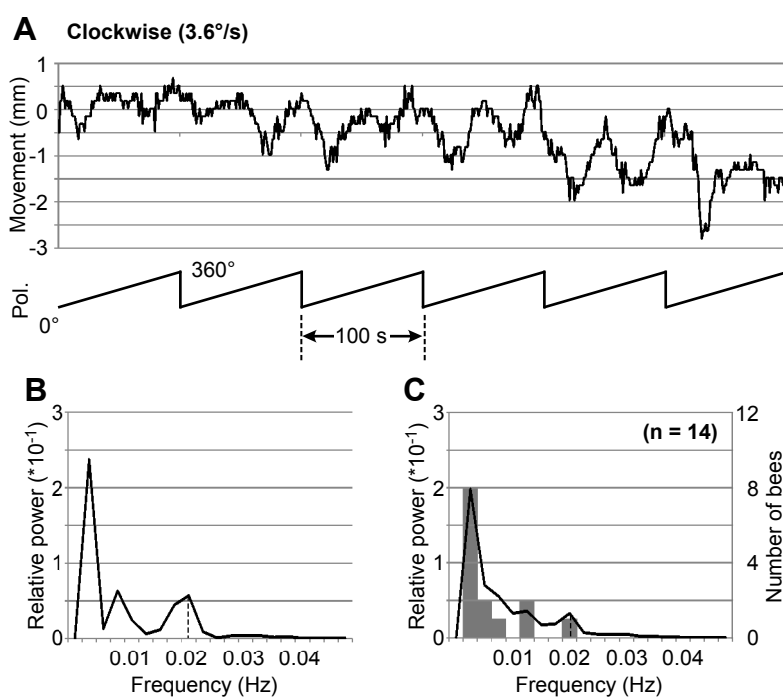

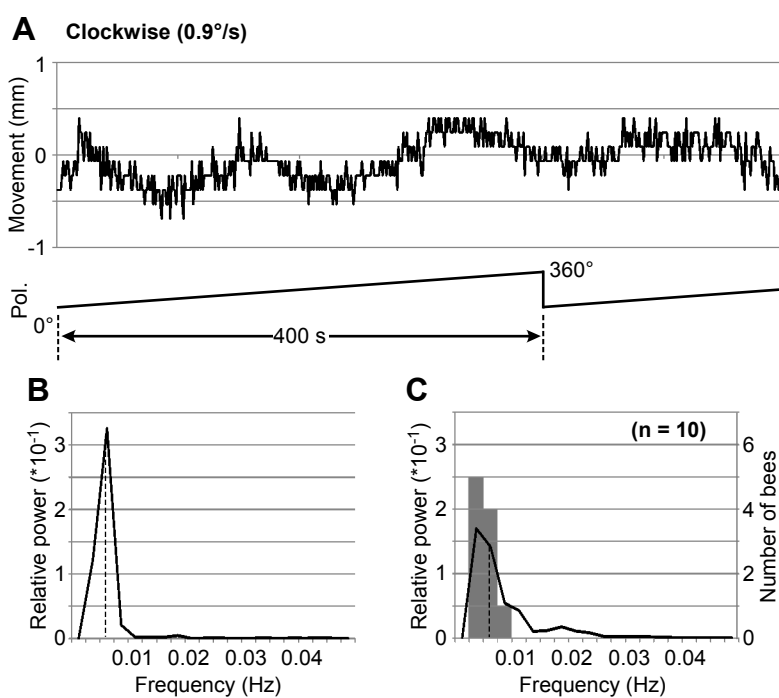

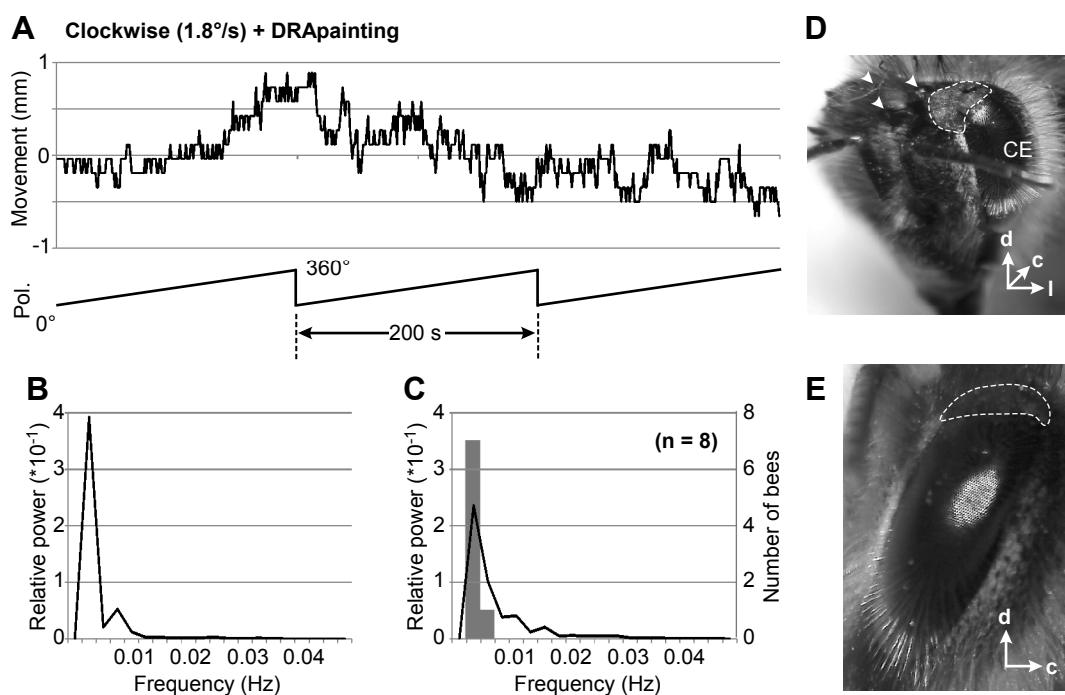

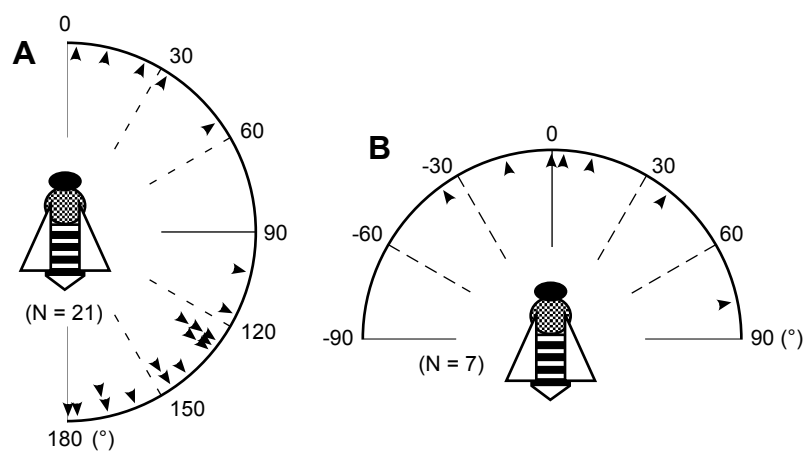

Source: http://biorxiv.org/content/10.1101/803809v1.full.pdf
